# Supplementary material for: Full-Length Transcriptome of Myotis pilosus as a Reference Resource and Mining of Auditory and Immune Related Genes
Source: MDPI journal article supplement (doi:10.3390/ijms24010062), 2022-12-21
Supplement: s1 [file s1]

## Supplemental materials

**Figure S1.** Tissue sample PacBio sequencing results.

**Figure S2.** Benchmarking universal single-copy orthologs (BUSCO) assessment results of the transcriptome generated.

**Figure S3.** The mean lengths of the subreads, CCS and transcripts in *R. a. hainanus*, *R. a. himalayanus* and *M. Pilosus*.

**Figure S4.** The comparative result of the *PRL-2* gene.

**Figure S5.** Several published genes were compared with full-length transcripts. The figure shows the comparative results for the *DPP4* gene.

**Figure S6.** Several published genes were compared with full-length transcripts. The comparative result of the *Glul* gene.

**Figure S7.** Several published genes were compared with full-length transcripts. The figure shows the comparative results for the *ND1* gene.

**Figure S8.** The proportion of full-length transcripts annotated in the metabolic pathways of the neural-related system.

**Figure S9.** Several published genes were compared with full-length transcripts. The figure shows the comparative results for the *GJB6* gene.

**Figure S10.** Several published genes were compared with full-length transcripts. The figure shows the comparative results for the *SK2* gene.

**Figure S11.** The number of overlapped transcripts among the top five immune pathways with the largest number of genes in the KEGG annotation.

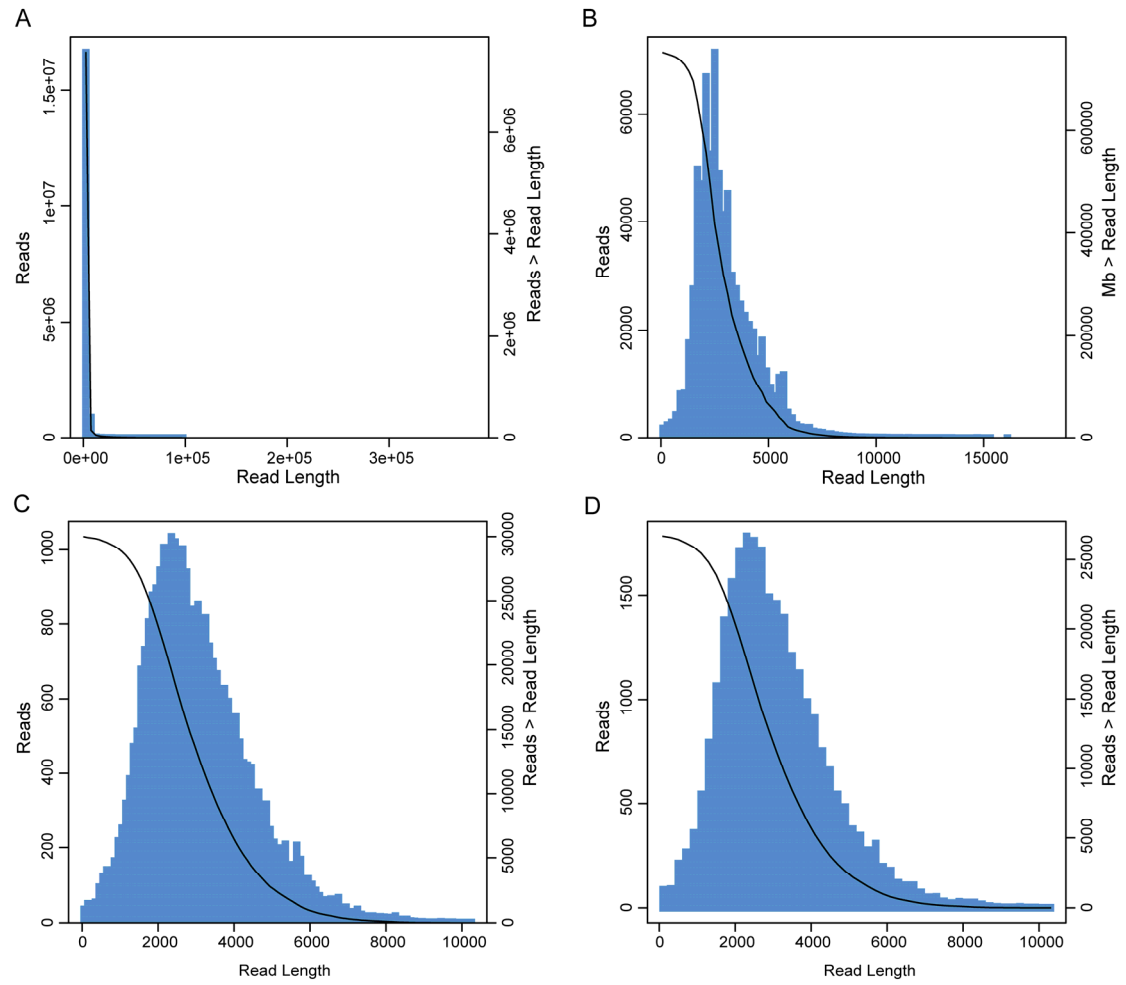

**Figure S1 Tissue sample PacBio sequencing results. (A)**Length distribution of subreads **(B)**Length distribution of CCS **(C)**Length distribution of Unpolished Consensus Isoforms **(D)** Length distribution of Isoform

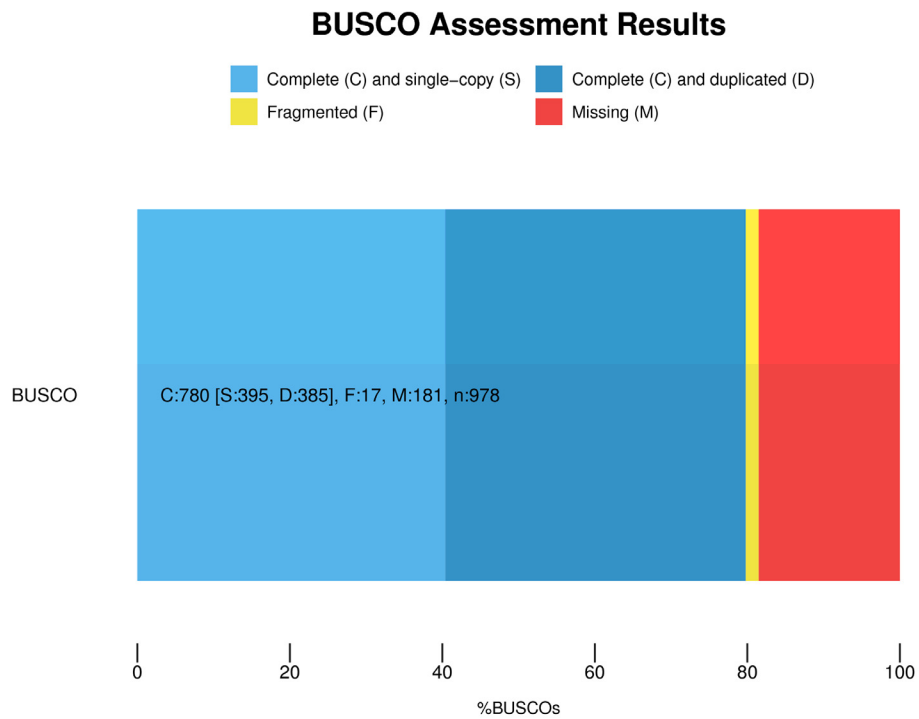

**Figure S2. Benchmarking universal single-copy orthologs (BUSCO) assessment results of transcriptome generated.**

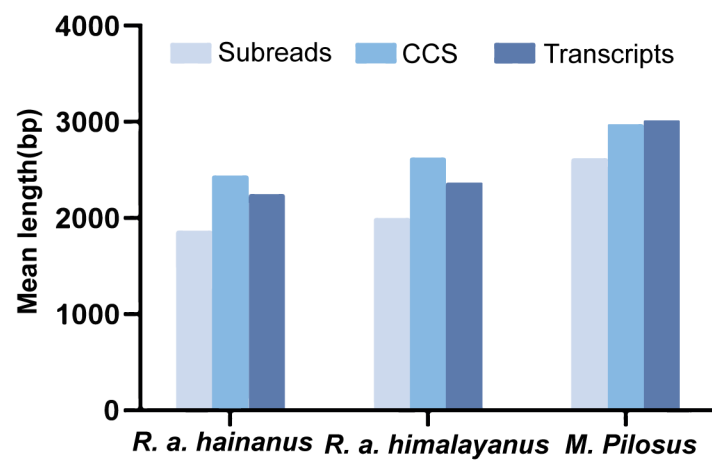

Figure S3. The mean length of the subreads, CCS and transcripts in *R. a. hainanus*, *R. a. himalayanus* and *M. Pilosus*, respectively.

|                |                                            |     |
|----------------|--------------------------------------------|-----|
| Isoform0022110 | TTTGCCATAATGAACCGTCCAGCCCCTGTGGAGATCTCCT   | 40  |
| PRL-2          | .....ATGAACCGTCCAGCCCCTGTGGAGATCTCCT       | 31  |
| Consensus      | atgaaccgtccagcccctgtggagatctcct            |     |
| Isoform0022110 | ATGAGAACATGCGTTTTCTGATTACTCACAACCCTACCAA   | 80  |
| PRL-2          | ATGAGAACATGCGTTTTCTGATTACTCACAACCCTACCAA   | 71  |
| Consensus      | atgagaacatgcgttttctgattactcacaaccctaccaa   |     |
| Isoform0022110 | TGCTACCCTCAACAAGTTCACAGAGGAACTTAAGAAGTAT   | 120 |
| PRL-2          | TGCTACCCTCAACAAGTTCACAGAGGAACTTAAGAAGTAT   | 111 |
| Consensus      | tgctaccctcaacaagttcacagaggaacttaagaagtat   |     |
| Isoform0022110 | GGAGTGACAACCTTTGGTTCGAGTTTGTGATGCTACATACG  | 160 |
| PRL-2          | GGAGTGACAACCTTTGGTTCGAGTTTGTGATGCTACATACG  | 151 |
| Consensus      | ggagtgacaactttggttcgagtttgtgatgctacatacg   |     |
| Isoform0022110 | ATAAAGCTCCAGTTGAAAAAGAAGGAATCCATGTTCTAGA   | 200 |
| PRL-2          | ATAAAGCTCCAGTTGAAAAAGAAGGAATCCATGTTCTAGA   | 191 |
| Consensus      | ataaagctccagttgaaaaagaaggaatccatgttctaga   |     |
| Isoform0022110 | TTGGCCATTTGATGATGGTGCGCCACCCCCTAATCAGATA   | 240 |
| PRL-2          | TTGGCCATTTGATGATGGTGCGCCACCCCCTAATCAGATA   | 231 |
| Consensus      | ttggccatttgatgatgggtgcgccaccccctaatacagata |     |
| Isoform0022110 | GTGGACGATTGGCTAAACCTATTAAAAACCAAATTTTCGTG  | 280 |
| PRL-2          | GTGGACGATTGGCTAAACCTATTAAAAACCAAATTTTCGTG  | 271 |
| Consensus      | gtggacgattggctaaacctattaaaaaccaaatttcgtg   |     |
| Isoform0022110 | AAGAACCAGGTTGCTGTGTTGCAGTGCATTGTGTTGCGGG   | 320 |
| PRL-2          | AAGAACCAGGTTGCTGTGTTGCAGTGCATTGTGTTGCGGG   | 311 |
| Consensus      | aagaaccaggttgctgtgttgagtcagtcattgtgttgcggg |     |
| Isoform0022110 | ATTGGGAAGGGCACCTGTGCTGGTTGCACTTGCTTTGATT   | 360 |
| PRL-2          | ATTGGGAAGGGCACCTGTGCTGGTTGCACTTGCTTTGATT   | 351 |
| Consensus      | attgggaagggcacctgtgctggttgcaattgctttgatt   |     |
| Isoform0022110 | GAATGTGGAATGAAGTATGAAGATGCAGTTCAGTTTATAA   | 400 |
| PRL-2          | GAATGTGGAATGAAGTATGAAGATGCAGTTCAGTTTATAA   | 391 |
| Consensus      | gaatgtggaatgaagtatgaagatgcagttcagtttataa   |     |
| Isoform0022110 | GACAAAAAAGAAGGGGAGCATTCAATTCCAAACAGCTGCT   | 440 |
| PRL-2          | GACAAAAAAGAAGGGGAGCATTCAATTCCAAACAGCTGCT   | 431 |
| Consensus      | gacaaaaaagaaggggagcattcaattccaaacagctgct   |     |
| Isoform0022110 | TTACCTGGAGAAATACCGACCTAAGATGCGATTACGCTTC   | 480 |
| PRL-2          | TTACCTGGAGAAATACCGACCTAAGATGCGATTACGCTTC   | 471 |
| Consensus      | ttacctggagaaataccgacctaagatgcgattacgcttc   |     |
| Isoform0022110 | AGAGATACCAATGGGCATTGCTGTGTTTCAG..          | 510 |
| PRL-2          | AGAGATACCAATGGGCATTGCTGTGTTTCAGTA          | 503 |
| Consensus      | agagataccaatgggcattgctgtgttcag             |     |

|                |                                          |     |
|----------------|------------------------------------------|-----|
| prl-2          | ...MNRPAPVEISYENMRFLITHNPTNATLNKFTEELKKY | 37  |
| Isoform0022110 | FAIMNRPAPVEISYENMRFLITHNPTNATLNKFTEELKKY | 40  |
| Consensus      | mnrpapveisyenmrflithnptnatlnkfteelkky    |     |
| prl-2          | GVTTLVRVCDATYDKAPVEKEGIHVLDWPFDDGAPPPNQI | 77  |
| Isoform0022110 | GVTTLVRVCDATYDKAPVEKEGIHVLDWPFDDGAPPPNQI | 80  |
| Consensus      | gvttlvrvcdatydkapvekegihvldwpfddgappnqi  |     |
| prl-2          | VDDWLNLLKTKFREEPGCCVAVHCVAGLGRAPVLVALALI | 117 |
| Isoform0022110 | VDDWLNLLKTKFREEPGCCVAVHCVAGLGRAPVLVALALI | 120 |
| Consensus      | vddwlnllktkfreepgccvavhcvaglgrapvlvalali |     |
| prl-2          | ECGMKYEDAVQFIRQKRRGAFNSKQLLYLEKYRPKMRLRF | 157 |
| Isoform0022110 | ECGMKYEDAVQFIRQKRRGAFNSKQLLYLEKYRPKMRLRF | 160 |
| Consensus      | ecgmkyedavqfirqkrrgafnsqllylekyrpkmrlrf  |     |
| prl-2          | RDTNGHCCV                                | 166 |
| Isoform0022110 | RDTNGHCCV                                | 169 |
| Consensus      | rdtnghccv                                |     |

**Figure S4**

Several published genes were compared with full-length transcripts, the comparative result of the *PRL-2* gene.



|               |                                       |      |
|---------------|---------------------------------------|------|
| Isaform001047 | ATGAAAGCAATGAAAGTCTCTGAACTCTGAA       | 40   |
| DPA           | ATGAAAGCAATGAAAGTCTCTGAACTCTGAA       | 40   |
| Consensus     | atgaaagcaatgaaagtggtgtgtggaggtgtggggg |      |
| Isaform001047 | CTGAGCTCTGACACATGACCTGAGCTGAGT        | 80   |
| DPA           | CTGAGCTCTGACACATGACCTGAGCTGAGT        | 80   |
| Consensus     | ctgagctctgacacatcagctgtgtgggtgtgt     |      |
| Isaform001047 | CTGAGCAAGATGATGATGATGATGATGATGAG      | 120  |
| DPA           | CTGAGCAAGATGATGATGATGATGATGATGAG      | 120  |
| Consensus     | gtgtgtgaaagtgtgtgtatgtgtgtgtgtgtgt    |      |
| Isaform001047 | TGACTTATGATGATGATGATGATGATGATGAT      | 160  |
| DPA           | TGACTTATGATGATGATGATGATGATGATGAT      | 160  |
| Consensus     | tcaactctagtgtgtgtgtgtgtgtgtgtgtgtgt   |      |
| Isaform001047 | GGACTCACTTCTGATGATGATGATGATGATGAT     | 200  |
| DPA           | GGACTCACTTCTGATGATGATGATGATGATGAT     | 200  |
| Consensus     | ggactcaactctgtgtgtgtgtgtgtgtgtgtgtgt  |      |
| Isaform001047 | TGACACAGAAATGATGATGATGATGATGATGAT     | 240  |
| DPA           | TGACACAGAAATGATGATGATGATGATGATGAT     | 240  |
| Consensus     | ctcaacagaaatgactgtgtgtgtgtgtgtgtgtgt  |      |
| Isaform001047 | CTGAGCACTCTGATGATGATGATGATGATGAT      | 280  |
| DPA           | CTGAGCACTCTGATGATGATGATGATGATGAT      | 280  |
| Consensus     | ctgaaagcaactctgtgtgtgtgtgtgtgtgtgtgt  |      |
| Isaform001047 | ATGATTTGACATGATGATGATGATGATGATGAT     | 320  |
| DPA           | ATGATTTGACATGATGATGATGATGATGATGAT     | 320  |
| Consensus     | atgatttggactctctagtgtgtgtgtgtgtgtgtgt |      |
| Isaform001047 | TGATGACTTCTCTCTGATGATGATGATGATGAT     | 360  |
| DPA           | TGATGACTTCTCTCTGATGATGATGATGATGAT     | 360  |
| Consensus     | tgtgtagaggtgtgtgtgtgtgtgtgtgtgtgtgt   |      |
| Isaform001047 | AAATGAGCTCTCTGACGCTCTCTGATGATGAT      | 400  |
| DPA           | AAATGAGCTCTCTGACGCTCTCTGATGATGAT      | 400  |
| Consensus     | aaatggagctctcagcgtctctgtgtgtgtgtgtgt  |      |
| Isaform001047 | ACTTAACAAAGTACTGTACAGCAAGCAAGATTT     | 440  |
| DPA           | ACTTAACAAAGTACTGTACAGCAAGCAAGATTT     | 440  |
| Consensus     | acttaacaaagtactgtacagcaagcaagattct    |      |
| Isaform001047 | AAATGACACTGATGATGATGATGATGATGATGAT    | 480  |
| DPA           | AAATGACACTGATGATGATGATGATGATGATGAT    | 480  |
| Consensus     | aaatgacaaagtgtgtgtgtgtgtgtgtgtgtgtgt  |      |
| Isaform001047 | AACTGTGATGATGATGATGATGATGATGATGAT     | 520  |
| DPA           | AACTGTGATGATGATGATGATGATGATGATGAT     | 520  |
| Consensus     | aaactgtgattgtgtgtgtgtgtgtgtgtgtgtgt   |      |
| Isaform001047 | ATGATCTATGATGATGATGATGATGATGATGAT     | 560  |
| DPA           | ATGATCTATGATGATGATGATGATGATGATGAT     | 560  |
| Consensus     | atgattctatgtgtgtgtgtgtgtgtgtgtgtgtgt  |      |
| Isaform001047 | AAAGAGCTGATGATGATGATGATGATGATGAT      | 600  |
| DPA           | AAAGAGCTGATGATGATGATGATGATGATGAT      | 600  |
| Consensus     | aaagagcgtgtgtgtgtgtgtgtgtgtgtgtgtgt   |      |
| Isaform001047 | TGAGAGCAAGATCTCTGATGATGATGATGATGAT    | 640  |
| DPA           | TGAGAGCAAGATCTCTGATGATGATGATGATGAT    | 640  |
| Consensus     | tatgaaagcaaatctcagtactcgtcgtcgtcgtgt  |      |
| Isaform001047 | GGTCTAAAGTGGCTTTTATGATGATGATGATGAT    | 680  |
| DPA           | GGTCTAAAGTGGCTTTTATGATGATGATGATGAT    | 680  |
| Consensus     | ggtctaaaggcacttttagactcgtcgtcgtgtgt   |      |
| Isaform001047 | GGACAGCTGATGATGATGATGATGATGATGAT      | 720  |
| DPA           | GGACAGCTGATGATGATGATGATGATGATGAT      | 720  |
| Consensus     | ggacagcagctcagcagtgactcgtcgtcgtcgtgt  |      |
| Isaform001047 | GGATGATGATGATGATGATGATGATGATGAT       | 760  |
| DPA           | GGATGATGATGATGATGATGATGATGATGAT       | 760  |
| Consensus     | ggatgtgtgtgtgtgtgtgtgtgtgtgtgtgtgt    |      |
| Isaform001047 | ACCAAGCTGATGATGATGATGATGATGATGAT      | 800  |
| DPA           | ACCAAGCTGATGATGATGATGATGATGATGAT      | 800  |
| Consensus     | accaagcagcagctgaaagtcaactgtgaaggtcta  |      |
| Isaform001047 | GGTGAATGATGATGATGATGATGATGATGAT       | 840  |
| DPA           | GGTGAATGATGATGATGATGATGATGATGAT       | 840  |
| Consensus     | ggtgtgaattgtgtgtgtgtgtgtgtgtgtgtgtgt  |      |
| Isaform001047 | GAATGATGATGATGATGATGATGATGATGAT       | 880  |
| DPA           | GAATGATGATGATGATGATGATGATGATGAT       | 880  |
| Consensus     | gaattgtgtcgtcgtcgtcgtcgtcgtcgtcgtcgt  |      |
| Isaform001047 | ACTGTGATGATGATGATGATGATGATGATGAT      | 920  |
| DPA           | ACTGTGATGATGATGATGATGATGATGATGAT      | 920  |
| Consensus     | acttgtgtgtgtgtgtgtgtgtgtgtgtgtgtgtgt  |      |
| Isaform001047 | TTTGATGATGATGATGATGATGATGATGATGAT     | 960  |
| DPA           | TTTGATGATGATGATGATGATGATGATGATGAT     | 960  |
| Consensus     | tttgtgtgtgtgtgtgtgtgtgtgtgtgtgtgtgt   |      |
| Isaform001047 | GGATTTGATGATGATGATGATGATGATGATGAT     | 1000 |
| DPA           | GGATTTGATGATGATGATGATGATGATGATGAT     | 1000 |
| Consensus     | gattttgtgtgtgtgtgtgtgtgtgtgtgtgtgtgt  |      |
| Isaform001047 | GTGATGATGATGATGATGATGATGATGATGAT      | 1040 |
| DPA           | GTGATGATGATGATGATGATGATGATGATGAT      | 1040 |
| Consensus     | gtgtgtgtgtgtgtgtgtgtgtgtgtgtgtgtgtgt  |      |
| Isaform001047 | TGATGATGATGATGATGATGATGATGATGAT       | 1080 |
| DPA           | TGATGATGATGATGATGATGATGATGATGAT       | 1080 |
| Consensus     | tgattgtgtgtgtgtgtgtgtgtgtgtgtgtgtgt   |      |
| Isaform001047 | CTGATGATGATGATGATGATGATGATGATGAT      | 1120 |
| DPA           | CTGATGATGATGATGATGATGATGATGATGAT      | 1120 |
| Consensus     | ctgtgtgtgtgtgtgtgtgtgtgtgtgtgtgtgtgt  |      |
| Isaform001047 | AGGTGATGATGATGATGATGATGATGATGAT       | 1160 |
| DPA           | AGGTGATGATGATGATGATGATGATGATGAT       | 1160 |
| Consensus     | aggtgtgtgtgtgtgtgtgtgtgtgtgtgtgtgtgt  |      |
| Isaform001047 | AAATGATGATGATGATGATGATGATGATGAT       | 1200 |
| DPA           | AAATGATGATGATGATGATGATGATGATGAT       | 1200 |
| Consensus     | aaattgtgtgtgtgtgtgtgtgtgtgtgtgtgtgtgt |      |
| Isaform001047 | GGATGATGATGATGATGATGATGATGATGAT       | 1240 |
| DPA           | GGATGATGATGATGATGATGATGATGATGAT       | 1240 |
| Consensus     | ggatgtgtgtgtgtgtgtgtgtgtgtgtgtgtgtgt  |      |
| Isaform001047 | GTGATGATGATGATGATGATGATGATGATGAT      | 1280 |
| DPA           | GTGATGATGATGATGATGATGATGATGATGAT      | 1280 |
| Consensus     | gtgtgtgtgtgtgtgtgtgtgtgtgtgtgtgtgtgt  |      |
| Isaform001047 | TGATGATGATGATGATGATGATGATGATGAT       | 1320 |
| DPA           | TGATGATGATGATGATGATGATGATGATGAT       | 1320 |
| Consensus     | tgaattgtgtgtgtgtgtgtgtgtgtgtgtgtgtgt  |      |
| Isaform001047 | ATGTGATGATGATGATGATGATGATGATGAT       | 1360 |
| DPA           | ATGTGATGATGATGATGATGATGATGATGAT       | 1360 |
| Consensus     | agtgtgtgtgtgtgtgtgtgtgtgtgtgtgtgtgt   |      |
| Isaform001047 | GTGATGATGATGATGATGATGATGATGATGAT      | 1400 |
| DPA           | GTGATGATGATGATGATGATGATGATGATGAT      | 1400 |
| Consensus     | gtgtgtgtgtgtgtgtgtgtgtgtgtgtgtgtgtgt  |      |
| Isaform001047 | TTGATGATGATGATGATGATGATGATGATGAT      | 1440 |
| DPA           | TTGATGATGATGATGATGATGATGATGATGAT      | 1440 |
| Consensus     | tttgtgtgtgtgtgtgtgtgtgtgtgtgtgtgtgt   |      |
| Isaform001047 | AGTATGATGATGATGATGATGATGATGATGAT      | 1480 |
| DPA           | AGTATGATGATGATGATGATGATGATGATGAT      | 1480 |
| Consensus     | agtgtgtgtgtgtgtgtgtgtgtgtgtgtgtgtgt   |      |
| Isaform001047 | TTTGTGATGATGATGATGATGATGATGATGAT      | 1520 |
| DPA           | TTTGTGATGATGATGATGATGATGATGATGAT      | 1520 |
| Consensus     | cttgtgtgtgtgtgtgtgtgtgtgtgtgtgtgtgt   |      |
| Isaform001047 | AACTGATGATGATGATGATGATGATGATGAT       | 1560 |
| DPA           | AACTGATGATGATGATGATGATGATGATGAT       | 1560 |
| Consensus     | aaactgtgtgtgtgtgtgtgtgtgtgtgtgtgtgt   |      |
| Isaform001047 | TGATGATGATGATGATGATGATGATGATGAT       | 1600 |
| DPA           | TGATGATGATGATGATGATGATGATGATGAT       | 1600 |
| Consensus     | tattgtgtgtgtgtgtgtgtgtgtgtgtgtgtgtgt  |      |
| Isaform001047 | AAATGATGATGATGATGATGATGATGATGAT       | 1640 |
| DPA           | AAATGATGATGATGATGATGATGATGATGAT       | 1640 |
| Consensus     | aaattgtgtgtgtgtgtgtgtgtgtgtgtgtgtgt   |      |
| Isaform001047 | CTGATGATGATGATGATGATGATGATGATGAT      | 1680 |
| DPA           | CTGATGATGATGATGATGATGATGATGATGAT      | 1680 |
| Consensus     | ctgaaagcagctgtgtgtgtgtgtgtgtgtgtgtgt  |      |
| Isaform001047 | TGATGATGATGATGATGATGATGATGATGAT       | 1720 |
| DPA           | TGATGATGATGATGATGATGATGATGATGAT       | 1720 |
| Consensus     | tattgtgtgtgtgtgtgtgtgtgtgtgtgtgtgtgt  |      |
| Isaform001047 | ATGTGATGATGATGATGATGATGATGATGAT       | 1760 |
| DPA           | ATGTGATGATGATGATGATGATGATGATGAT       | 1760 |
| Consensus     | atgtgtgtgtgtgtgtgtgtgtgtgtgtgtgtgtgt  |      |
| Isaform001047 | GGATGATGATGATGATGATGATGATGATGAT       | 1800 |
| DPA           | GGATGATGATGATGATGATGATGATGATGAT       | 1800 |
| Consensus     | gtgtgtgtgtgtgtgtgtgtgtgtgtgtgtgtgtgt  |      |
| Isaform001047 | GAATGATGATGATGATGATGATGATGATGAT       | 1840 |
| DPA           | GAATGATGATGATGATGATGATGATGATGAT       | 1840 |
| Consensus     | gaattgtgtgtgtgtgtgtgtgtgtgtgtgtgtgtgt |      |
| Isaform001047 | GGATGATGATGATGATGATGATGATGATGAT       | 1880 |
| DPA           | GGATGATGATGATGATGATGATGATGATGAT       | 1880 |
| Consensus     | ggatgtgtgtgtgtgtgtgtgtgtgtgtgtgtgtgt  |      |
| Isaform001047 | AGGTGATGATGATGATGATGATGATGATGAT       | 1920 |
| DPA           | AGGTGATGATGATGATGATGATGATGATGAT       | 1920 |
| Consensus     | aggtgtgtgtgtgtgtgtgtgtgtgtgtgtgtgtgt  |      |
| Isaform001047 | GTGATGATGATGATGATGATGATGATGATGAT      | 1960 |
| DPA           | GTGATGATGATGATGATGATGATGATGATGAT      | 1960 |
| Consensus     | gtgtgtgtgtgtgtgtgtgtgtgtgtgtgtgtgtgt  |      |
| Isaform001047 | GGATGATGATGATGATGATGATGATGATGAT       | 2000 |
| DPA           | GGATGATGATGATGATGATGATGATGATGAT       | 2000 |
| Consensus     | ggatgtgtgtgtgtgtgtgtgtgtgtgtgtgtgtgt  |      |
| Isaform001047 | TTGATGATGATGATGATGATGATGATGATGAT      | 2040 |
| DPA           | TTGATGATGATGATGATGATGATGATGATGAT      | 2040 |
| Consensus     | tttgtgtgtgtgtgtgtgtgtgtgtgtgtgtgtgt   |      |
| Isaform001047 | TGATGATGATGATGATGATGATGATGATGAT       | 2080 |
| DPA           | TGATGATGATGATGATGATGATGATGATGAT       | 2080 |
| Consensus     | tgaagcgtctgtgtgtgtgtgtgtgtgtgtgtgtgt  |      |
| Isaform001047 | AGTATGATGATGATGATGATGATGATGATGAT      | 2120 |
| DPA           | AGTATGATGATGATGATGATGATGATGATGAT      | 2120 |
| Consensus     | agtactcgtactcgtgtgtgtgtgtgtgtgtgtgtgt |      |
| Isaform001047 | TTTGTGATGATGATGATGATGATGATGATGAT      | 2160 |
| DPA           | TTTGTGATGATGATGATGATGATGATGATGAT      | 2160 |
| Consensus     | tttgtgtgtgtgtgtgtgtgtgtgtgtgtgtgtgt   |      |
| Isaform001047 | GTGATGATGATGATGATGATGATGATGATGAT      | 2200 |
| DPA           | GTGATGATGATGATGATGATGATGATGATGAT      | 2200 |
| Consensus     | gtgtgtgtgtgtgtgtgtgtgtgtgtgtgtgtgtgt  |      |
| Isaform001047 | AGTATGATGATGATGATGATGATGATGATGAT      | 2240 |
| DPA           | AGTATGATGATGATGATGATGATGATGATGAT      | 2240 |
| Consensus     | agtgtgtgtgtgtgtgtgtgtgtgtgtgtgtgtgt   |      |
| Isaform001047 | GGATGATGATGATGATGATGATGATGATGAT       | 2280 |
| DPA           | GGATGATGATGATGATGATGATGATGATGAT       | 2280 |
| Consensus     | ggatgtgtgtgtgtgtgtgtgtgtgtgtgtgtgtgt  |      |
| Isaform001047 | CTGATGATGATGATGATGATGATGATGATGAT      | 2320 |
| DPA           | CTGATGATGATGATGATGATGATGATGATGAT      | 2320 |
| Consensus     | ctgtgtgtgtgtgtgtgtgtgtgtgtgtgtgtgtgt  |      |
| Isaform001047 | CTG                                   | 2380 |
| DPA           | CTG                                   | 2380 |
| Consensus     | ctg                                   |      |



|                |                                                        |     |
|----------------|--------------------------------------------------------|-----|
| Isoform0010147 | MKTQWKVLLGLLGA <sup>A</sup> ALVTIITVPAVLLSKDDVIVDDRRT  | 40  |
| DPP4           | MKTQWKVLLGLLGAV <sup>A</sup> ALVTIITVPAVLLSKDDVIVDDRRT | 40  |
| Consensus      | mktqwkvlglgla alvtiitvpavllskdddivddrtr                |     |
| Isoform0010147 | YTLADYLKSTIRMRNYNLRWISDHEYLYKQENNVLLFNAD               | 80  |
| DPP4           | YTLADYLKSTIRMRNYNLRWISDHEYLYKQENNVLLFNAD               | 80  |
| Consensus      | ytladylkstirmrnynlrwisdheylykqennvllfnad               |     |
| Isoform0010147 | HGNSSTFLENSTFDQFGHSISDYSVSPDRQFVLFYNYVK                | 120 |
| DPP4           | HGNSSTFLENSTFDQFGHSISDYSVSPDRQFVLFYNYVK                | 120 |
| Consensus      | hgnsstflenstfdqfghsisdysvspdrqfvlfeynyvk               |     |
| Isoform0010147 | KWRHSYTASYDIYDLNKRQLITEERIPNDTQLIRWSPEGH               | 160 |
| DPP4           | KWRHSYTASYDIYDLNKRQLITEERIPNDTQLIRWSPEGH               | 160 |
| Consensus      | kwrhsytasydiydlnkrqliteeripndtqlirwspeg                |     |
| Isoform0010147 | KLAYVWNNDIYVKNDPYSPSRVTRDGREDAISNGITDWV                | 200 |
| DPP4           | KLAYVWNNDIYVKNDPYSPSRVTRDGREDAISNGITDWV                | 200 |
| Consensus      | klayvwnndiyvknpyspsrvtredgremaisngitdwv                |     |
| Isoform0010147 | YEEEIFSTHSALWWSPNGTFLAYAQFNDTDVPRIEYSVYL               | 240 |
| DPP4           | YEEEIFSTHSALWWSPNGTFLAYAQFNDTDVPRIEYSVYL               | 240 |
| Consensus      | yeeiefsthsalwvspngtflayaqfndtdvprieysvyl               |     |
| Isoform0010147 | DESLQYPKTIHIPYPKAGAKNPTVKLYVVNTDNLTDLEPV               | 280 |
| DPP4           | DESLQYPKTIHIPYPKAGAKNPTVKLYVVNTDNLTDLEPV               | 280 |
| Consensus      | deslqypktihipypkagaknptvklyvvntdnltdlepv               |     |
| Isoform0010147 | QIVAPASVLIGDHLYLCDVTWATKERISLQWLRRIQNYSII              | 320 |
| DPP4           | QIVAPASVLIGDHLYLCDVTWATKERISLQWLRRIQNYSII              | 320 |
| Consensus      | qivapasvligdhylcdvtwatkerislqwlrriqnysii               |     |
| Isoform0010147 | DICDYNESTPKWNCLVSRQHIETSATGWVGRFKPAEPHFT               | 360 |
| DPP4           | DICDYNESTPKWNCLVSRQHIETSATGWVGRFKPAEPHFT               | 360 |
| Consensus      | dicdynestpkwnclvsrqhietsatgwvgrfkpaephft               |     |
| Isoform0010147 | SDGNSFYKIMSNTEGYKHICLFQIDKPNCTFITKGAWEVI               | 400 |
| DPP4           | SDGNSFYKIMSNTEGYKHICLFQIDKPNCTFITKGAWEVI               | 400 |
| Consensus      | sdgnsfykimsntegykhiclfqidkpnctfitkgawe                 |     |
| Isoform0010147 | GIEALTNDYLYYISNEYKGMPPGRNLYKIQRNNYANVTCL               | 440 |
| DPP4           | GIEALTNDYLYYISNEYKGMPPGRNLYKIQRNNYANVTCL               | 440 |
| Consensus      | giealtndylyyisneykgmpgrnlykiqrnnyanvtcl                |     |
| Isoform0010147 | SCELDPERCQYYSASFSGAKYYQLRCSGPQIPRYSLHSS                | 480 |
| DPP4           | SCELDPERCQYYSASFSGAKYYQLRCSGPQIPRYSLHSS                | 480 |
| Consensus      | sceldpercqyysasfsgakyyqlrcsgqpipryslhss                |     |
| Isoform0010147 | SNDKELRLLENNTALYETLQNIQMPRKTLDFIHLNGTKFW               | 520 |
| DPP4           | SNDKELRLLENNTALYETLQNIQMPRKTLDFIHLNGTKFW               | 520 |
| Consensus      | sndkelrllenntalyetlqniqmprktldfihlngtkfw               |     |
| Isoform0010147 | YQMILPPHFDKSKKYPLLIDVYAGPCSQKADATFKLSWAT               | 560 |
| DPP4           | YQMILPPHFDKSKKYPLLIDVYAGPCSQKADATFKLSWAT               | 560 |
| Consensus      | yqmilpphfdkskkypllidyagpcsqkadatfklswat                |     |
| Isoform0010147 | YLASTENIIIVASFDRGSGYQGD <sup>K</sup> IMHAINRRLGTFEVED  | 600 |
| DPP4           | YLASTENIIIVASFDRGSGYQGD <sup>K</sup> IMHAINRRLGTFEVED  | 600 |
| Consensus      | ylasteniivasfdrgsgyqgd <sup>k</sup> imhainrrlgtfeved   |     |
| Isoform0010147 | QIEAAKQFSKMGFVDDKRIAIWGSYGGYVTSMLVLAGSR                | 640 |
| DPP4           | QIEAAKQFSKMGFVDDKRIAIWGSYGGYVTSMLVLAGSR                | 640 |
| Consensus      | qieaakqfsmgfvddkriaiwgsygyvtsmvlagagr                  |     |
| Isoform0010147 | VFKCGIAPVSAWEFYDSVYTERYMGLPTPEDNLDHYKN                 | 680 |
| DPP4           | VFKCGIAPVSAWEFYDSVYTERYMGLPTPEDNLDHYKN                 | 680 |
| Consensus      | vfkcgiaapvsawefydsvyterymglptpednldhykn                |     |
| Isoform0010147 | STVMSRAENFKLVEYLLIHGTADDNVHFQQSAQITRALVD               | 720 |
| DPP4           | STVMSRAENFKLVEYLLIHGTADDNVHFQQSAQITRALVD               | 720 |
| Consensus      | stvmsraenfkiveyllihgtaddnvhfqqsaqitralvd               |     |
| Isoform0010147 | AGVDFQAMWYTDEDHGIATSTAHQHIYTHMTHFIKQCFSL               | 760 |
| DPP4           | AGVDFQAMWYTDEDHGIATSTAHQHIYTHMTHFIKQCFSL               | 760 |
| Consensus      | agvdfqamwytdedhgiatstahqhiythmthfikqcfsl               |     |

Figure S5. Several published genes were compared with full-length transcripts, the comparative result of the *DPP4* gene.

|                |                                            |     |                                            |      |
|----------------|--------------------------------------------|-----|--------------------------------------------|------|
| Isoform0020210 | SCAACTTCCACC                               | ATG | CCACCTCAGCGAGTCCCACTTGA                    | 40   |
| Glul           | .....                                      | ATG | CCACCTCAGCGAGTCCCACTTGA                    | 28   |
| Consensus      |                                            | atg | ccacctcagcgagttcccacttga                   |      |
| Isoform0020210 | ACAAAGGCATCAAGCAGATGTACATCTGCCCTGCTCAGGG   |     |                                            | 80   |
| Glul           | ACAAAGGCATCAAGCAGATGTACATCTGCCCTGCTCAGGG   |     |                                            | 68   |
| Consensus      |                                            |     | acaaaggcatcaagcagatgtacatgtccctgctcaggg    |      |
| Isoform0020210 | TGATAAAGTCCAAGCTATGTACATCTGGATTGACGGTACT   |     |                                            | 120  |
| Glul           | TGATAAAGTCCAAGCTATGTACATCTGGATTGACGGTACT   |     |                                            | 108  |
| Consensus      |                                            |     | tgataaagtccaagctatgtacatctggattgacggctact  |      |
| Isoform0020210 | GGAGAAAGGATCGCATGCAAGACCCGGACCTGGACAGTG    |     |                                            | 160  |
| Glul           | GGAGAAAGGATCGCATGCAAGACCCGGACCTGGACAGTG    |     |                                            | 148  |
| Consensus      |                                            |     | ggagaaggactcgatgcaagacccggacctggacagtg     |      |
| Isoform0020210 | AGCCCAAGAGTATAGAAAGTTGCCCGAGTGGAAATTTTGA   |     |                                            | 200  |
| Glul           | AGCCCAAGAGTATAGAAAGTTGCCCGAGTGGAAATTTTGA   |     |                                            | 188  |
| Consensus      |                                            |     | agcccaagagtatagaagagttgcccgagtggaaattttga  |      |
| Isoform0020210 | TGGCTCTAGTACTATGCAGTCTGAAGGCTCCACAGTGAC    |     |                                            | 240  |
| Glul           | TGGCTCTAGTACTATGCAGTCTGAAGGCTCCACAGTGAC    |     |                                            | 228  |
| Consensus      |                                            |     | tggctctagtactatgcagtctgaaggctccaacagtac    |      |
| Isoform0020210 | ATGTATCTTGTCTCTGCTACCATGTTTCGGGACCTTTCC    |     |                                            | 280  |
| Glul           | ATGTATCTTGTCTCTGCTACCATGTTTCGGGACCTTTCC    |     |                                            | 268  |
| Consensus      |                                            |     | atgtatcttgtctctgctaccatgtttcgggacctttcc    |      |
| Isoform0020210 | GCAAGGACCCCAACAGCTGGTGTCTGTGAAGTCTTAAA     |     |                                            | 320  |
| Glul           | GCAAGGACCCCAACAGCTGGTGTCTGTGAAGTCTTAAA     |     |                                            | 308  |
| Consensus      |                                            |     | gcaaggaccccaacagctgggtgtctgtgaagtctttaa    |      |
| Isoform0020210 | ATACAAACCGCAACCTGCAGAGACCAATTAAAGATATAAC   |     |                                            | 360  |
| Glul           | ATACAAACCGCAACCTGCAGAGACCAATTAAAGATATAAC   |     |                                            | 348  |
| Consensus      |                                            |     | atacaaccgcaaacctgcagagaccaatttaagataatacc  |      |
| Isoform0020210 | TGCAAAACGGATAATGGACATGGTGAGCAATCAGCATCCCT  |     |                                            | 400  |
| Glul           | TGCAAAACGGATAATGGACATGGTGAGCAATCAGCATCCCT  |     |                                            | 388  |
| Consensus      |                                            |     | tgcaaacggataatggacatgggtgagcaatcagcatccct  |      |
| Isoform0020210 | GGTTTGGAAATGGAGCAGGAATATACCTCTCATGGGACAGAG |     |                                            | 440  |
| Glul           | GGTTTGGAAATGGAGCAGGAATATACCTCTCATGGGACAGAG |     |                                            | 428  |
| Consensus      |                                            |     | ggtttgaatggagcaggaataatactctcatgggacagag   |      |
| Isoform0020210 | TGGGCAACCTTTTGGCTGGCTTCCAAATGGCTTCCCTGGG   |     |                                            | 480  |
| Glul           | TGGGCAACCTTTTGGCTGGCTTCCAAATGGCTTCCCTGGG   |     |                                            | 468  |
| Consensus      |                                            |     | tgggcacccttttggctggccttccaatggcttccctggg   |      |
| Isoform0020210 | CCCCAAGGTCATCTACTGCGGTGTGGGAGCAGACAGAG     |     |                                            | 520  |
| Glul           | CCCCAAGGTCATCTACTGCGGTGTGGGAGCAGACAGAG     |     |                                            | 508  |
| Consensus      |                                            |     | ccccaaaggctccatactactgcggtgtgggagcagacagag |      |
| Isoform0020210 | CCTACGGCAGGGATATTGTGGAGGCTCACTACCGGGCTG    |     |                                            | 560  |
| Glul           | CCTACGGCAGGGATATTGTGGAGGCTCACTACCGGGCTG    |     |                                            | 548  |
| Consensus      |                                            |     | cctacggcagggatattgtggaggctcactacggggcctg   |      |
| Isoform0020210 | CTTGTAAGCTGCGCATCAAGATCGCAGGGCAAAATGCCGAG  |     |                                            | 600  |
| Glul           | CTTGTAAGCTGCGCATCAAGATCGCAGGGCAAAATGCCGAG  |     |                                            | 588  |
| Consensus      |                                            |     | cttgtaagctgcgcatcaagatcgagggacaaatgccgag   |      |
| Isoform0020210 | GTCAATGCCCGCCAGTGGGAATTCCAAATAGGACCTGTG    |     |                                            | 640  |
| Glul           | GTCAATGCCCGCCAGTGGGAATTCCAAATAGGACCTGTG    |     |                                            | 628  |
| Consensus      |                                            |     | gtcatgcccgccagtggaatttccaaataggacctgtg     |      |
| Isoform0020210 | AAGGCATCGACATGGGAGATCATCTCGGTGGCCCGTTT     |     |                                            | 680  |
| Glul           | AAGGCATCGACATGGGAGATCATCTCGGTGGCCCGTTT     |     |                                            | 668  |
| Consensus      |                                            |     | aaggcatcgacatgggagatcatctcgggtggcccgttt    |      |
| Isoform0020210 | CATCTTGACCGAGTGTGTGAAGACTTCGAGTGTATCGCT    |     |                                            | 720  |
| Glul           | CATCTTGACCGAGTGTGTGAAGACTTCGAGTGTATCGCT    |     |                                            | 708  |
| Consensus      |                                            |     | catcttgaccgagtggtgaagacttcggagtgtatcgct    |      |
| Isoform0020210 | ACCTTTGATCCCAAGCCCATCCCTGGCAACTGGAATGGTG   |     |                                            | 760  |
| Glul           | ACCTTTGATCCCAAGCCCATCCCTGGCAACTGGAATGGTG   |     |                                            | 748  |
| Consensus      |                                            |     | acctttgatcccaagcccatccctggcaactggaatggtg   |      |
| Isoform0020210 | CAGGCTGCCACACCAACTTCAGCACCAAGCCATGCGAGA    |     |                                            | 800  |
| Glul           | CAGGCTGCCACACCAACTTCAGCACCAAGCCATGCGAGA    |     |                                            | 788  |
| Consensus      |                                            |     | caggctgccacaccaacttcagcaccaaggccatgcgaga   |      |
| Isoform0020210 | GGAGAAACGCTCTGAAGTACATCGAGGAGTCCATTGAGAGG  |     |                                            | 840  |
| Glul           | GGAGAAACGCTCTGAAGTACATCGAGGAGTCCATTGAGAGG  |     |                                            | 828  |
| Consensus      |                                            |     | ggagaacggtctgaagtacatcgaggagtccattgagagg   |      |
| Isoform0020210 | CTGAGCAAGCGGCACCAAGTACCAATCCGAGCCTACGACC   |     |                                            | 880  |
| Glul           | CTGAGCAAGCGGCACCAAGTACCAATCCGAGCCTACGACC   |     |                                            | 868  |
| Consensus      |                                            |     | ctgagcaagcggcaccagtaaccatccgagcctacgacc    |      |
| Isoform0020210 | CCAAAGGGGGCCGGGACAAATGCCCGGCGCTCACCGGATT   |     |                                            | 920  |
| Glul           | CCAAAGGGGGCCGGGACAAATGCCCGGCGCTCACCGGATT   |     |                                            | 908  |
| Consensus      |                                            |     | ccaaagggggccgggacaatgcccgcgctcacoggatt     |      |
| Isoform0020210 | TAACGAAACCTCCAACATCAACGACTTCTCGCGCGCGTG    |     |                                            | 960  |
| Glul           | TAACGAAACCTCCAACATCAACGACTTCTCGCGCGCGTG    |     |                                            | 948  |
| Consensus      |                                            |     | taacgaaacctccaacatcaacgacttctcgcgcgcggtg   |      |
| Isoform0020210 | GCCAACCGTAGCGCCAGCATCCGATTCCCCGGTCTGTGG    |     |                                            | 1000 |
| Glul           | GCCAACCGTAGCGCCAGCATCCGATTCCCCGGTCTGTGG    |     |                                            | 988  |
| Consensus      |                                            |     | gccaacctgtagcggccagcatccgattccccggctgtgg   |      |
| Isoform0020210 | GCCAGGAGAAAGAGGGGTACTTTGAAGACCGGCGCCCTC    |     |                                            | 1040 |
| Glul           | GCCAGGAGAAAGAGGGGTACTTTGAAGACCGGCGCCCTC    |     |                                            | 1028 |
| Consensus      |                                            |     | gccaggagaagaaggggtactttgaagacccggcgccctc   |      |
| Isoform0020210 | TGCCAACTGCGACCCCTTCGCAGTGACAGAAGCCCTCATC   |     |                                            | 1080 |
| Glul           | TGCCAACTGCGACCCCTTCGCAGTGACAGAAGCCCTCATC   |     |                                            | 1068 |
| Consensus      |                                            |     | tgccaaactgcgaccccttcgcagtgacagaagccctcatc  |      |
| Isoform0020210 | CGCACGTGTCTTCTCAATGAAACTGGCGATGAGCCCTTCC   |     |                                            | 1120 |
| Glul           | CGCACGTGTCTTCTCAATGAAACTGGCGATGAGCCCTTCC   |     |                                            | 1108 |
| Consensus      |                                            |     | cgcacgtgtcttctcaatgaaactggcgatgagcccttcc   |      |
| Isoform0020210 | AGTACAAAAAC                                |     |                                            | 1131 |
| Glul           | AGTACAAAAAC                                |     |                                            | 1121 |
| Consensus      |                                            |     | agtacaaaaac                                |      |

|                |                                            |     |
|----------------|--------------------------------------------|-----|
| Isoform0020210 | ATSTMTSASSHLNKGIKQMYMSLPQGDQVQAMYIWIDGT    | 40  |
| Glul           | ....MATSSASSHLNKGIKQMYMSLPQGDQVQAMYIWIDGT  | 36  |
| Consensus      | m tsasshlnkgikqmymslpqgdqkvqamyiwidgt      |     |
| Isoform0020210 | GEGLRCKTRTLDSEPKSIEELPEWNFDGSSTMQSEGSNSD   | 80  |
| Glul           | GEGLRCKTRTLDSEPKSIEELPEWNFDGSSTMQSEGSNSD   | 76  |
| Consensus      | geglrcktrtldsepk sieelpewnfdgsstmqsegsnsd  |     |
| Isoform0020210 | MYLVPATMFRDPFRKDPNKLVFCEVLKYNRKPAETNLRYT   | 120 |
| Glul           | MYLVPATMFRDPFRKDPNKLVFCEVLKYNRKPAETNLRYT   | 116 |
| Consensus      | mylvpatmfrdpfrkdpnklvfcevlkynrkpaetnlryt   |     |
| Isoform0020210 | CKRIMDMVSNQHPWFGMEQEYTLMGTDGHPFGWPSNGFPG   | 160 |
| Glul           | CKRIMDMVSNQHPWFGMEQEYTLMGTDGHPFGWPSNGFPG   | 156 |
| Consensus      | ckrimdmvsnqhpwfgmeqeytlmgtdghpfgwpsngfpg   |     |
| Isoform0020210 | PQGPYYCGVGADRAYGRDIVEAHYRACLYAGIKIAGTNAE   | 200 |
| Glul           | PQGPYYCGVGADRAYGRDIVEAHYRACLYAGIKIAGTNAE   | 196 |
| Consensus      | pqgpYYcgvgadraygrdiveahyraclyagikiagt nae  |     |
| Isoform0020210 | VMPAQWEFQIGPCEGIDMGDHLWVARFILHRVCEDFGVIA   | 240 |
| Glul           | VMPAQWEFQIGPCEGIDMGDHLWVARFILHRVCEDFGVIA   | 236 |
| Consensus      | vmpaqwefqigpcegidmgdhlwvarfilhrvcedfgvia   |     |
| Isoform0020210 | TFDPKPIPGNWNAGAGCHTNFSTKAMREENGLKYIEESIER  | 280 |
| Glul           | TFDPKPIPGNWNAGAGCHTNFSTKAMREENGLKYIEESIER  | 276 |
| Consensus      | tfdpkpipgnwnagagchtnfstkamreen glkyieesier |     |
| Isoform0020210 | LSKRHQYHIRAYDPKGGRDNARRLTGFNETSNINDFSAGV   | 320 |
| Glul           | LSKRHQYHIRAYDPKGGRDNARRLTGFNETSNINDFSAGV   | 316 |
| Consensus      | lskrhqyhiraydpkggrdnarrltgfnetsnindfsagv   |     |
| Isoform0020210 | ANRSASIRIPRSVGQEKKGYFEDRRPSANCDPFAVTEALI   | 360 |
| Glul           | ANRSASIRIPRSVGQEKKGYFEDRRPSANCDPFAVTEALI   | 356 |
| Consensus      | anrsasiriprsvgqe kkyfedrrpsan cdpfavteali  |     |
| Isoform0020210 | RTCLLNETGDEPFQYK                           | 376 |
| Glul           | RTCLLNETGDEPFQYK                           | 372 |
| Consensus      | rtcllnetgdepfqyk                           |     |

**Figure S6.** Several published genes were compared with full-length transcripts, the comparative result of the *Glul* gene.

|                |                                            |     |
|----------------|--------------------------------------------|-----|
| Isoform0025243 | ATGTATTTTCATTAATCTACTAACAAATAATCGTTCCCATCC | 40  |
| ND1            | ATGTATTTTCATTAATCTACTAACAAATAATCGTTCCCATCC | 40  |
| Consensus      | atgtattttcattaatctactaacaataatcgttcccatcc  |     |
| Isoform0025243 | TACTAGCCGTAGCATTTTAAACCTGCTAGAACGAAAAGT    | 80  |
| ND1            | TACTAGCCGTAGCATTTTAAACCTGCTAGAACGAAAAGT    | 80  |
| Consensus      | tactagccgtagcatttttaaccctgctagaaacgaaaagt  |     |
| Isoform0025243 | ACTAGGTTATATACAACCTTCGAAAAGGACCAACATTGTT   | 120 |
| ND1            | ACTAGGTTATATACAACCTTCGAAAAGGACCAACATTGTT   | 120 |
| Consensus      | actaggttatatacaacttcgaaaaggaccaaacattggtt  |     |
| Isoform0025243 | GGTCCTTACGGTTTACTGCAGCCAATCGCTGACGCAGTCA   | 160 |
| ND1            | GGTCCTTACGGTTTACTGCAGCCAATCGCTGACGCAGTCA   | 160 |
| Consensus      | ggtccttacggtttactgcagccaatcgctgacgcagtca   |     |
| Isoform0025243 | AATTATTTACTAAAGAACCTATACAACCACTAACATCATC   | 200 |
| ND1            | AATTATTTACTAAAGAACCTATACAACCACTAACATCATC   | 200 |
| Consensus      | aattattttactaaagaacctatacaaccactaacatcatc  |     |
| Isoform0025243 | TCTTACCTTATTCTATTGCTCCTACTTTAGCCCTGACT     | 240 |
| ND1            | TCTTACCTTATTCTATTGCTCCTACTTTAGCCCTGACT     | 240 |
| Consensus      | tcttaccttattctatttgctcctactttagccctgact    |     |
| Isoform0025243 | TTAGCCCTAATAATATGAATCCATTACCCATACCACATC    | 280 |
| ND1            | TTAGCCCTAATAATATGAATCCATTACCCATACCACATC    | 280 |
| Consensus      | ttagccctaataatataatgaatccattaccataaccacatc |     |
| Isoform0025243 | CCCTAATTAAACATAAACCTAAGCATACTATTATACCTAGC  | 320 |
| ND1            | CCCTAATTAAACATAAACCTAAGCATACTATTATACCTAGC  | 320 |
| Consensus      | ccctaattaacataaacctaagcatactattatactagc    |     |
| Isoform0025243 | TCTATCAAGTCTGGCGTCTACGCTATTCTATGATCAGGC    | 360 |
| ND1            | TCTATCAAGTCTGGCGTCTACGCTATTCTATGATCAGGC    | 360 |
| Consensus      | tctatcaagtctggcgtctacgctattctatgatcaggc    |     |
| Isoform0025243 | TGAGCTTCAAATTCAAATAACGCATTAAATTGGAGCCTTAC  | 400 |
| ND1            | TGAGCTTCAAATTCAAATAACGCATTAAATTGGAGCCTTAC  | 400 |
| Consensus      | tgagcttcaaattcaaaatacgcattaattggagccttac   |     |
| Isoform0025243 | GAGCAGTAGCCCAACAACTCTCTATGAAGTAACCCCTAGC   | 440 |
| ND1            | GAGCAGTAGCCCAACAACTCTCTATGAAGTAACCCCTAGC   | 440 |
| Consensus      | gagcagtagcccaacaactctctatgaagtaaccctagc    |     |
| Isoform0025243 | CATTATTATTCTATCCATCCTGCTTATAAATGGCTCATTC   | 480 |
| ND1            | CATTATTATTCTATCCATCCTGCTTATAAATGGCTCATTC   | 480 |
| Consensus      | cattattattctatccatcctgcttataaatggctcattc   |     |
| Isoform0025243 | ACATTAACCACTACTAATTACACACAGAATATATCTGAT    | 520 |
| ND1            | ACATTAACCACTACTAATTACACACAGAATATATCTGAT    | 520 |
| Consensus      | acattaacca actaattacaacacagaatatatctgat    |     |
| Isoform0025243 | TAATTATTCCCTCATGACCTCTGGCTATAATATGATTAT    | 560 |
| ND1            | TAATTATTCCCTCATGACCTCTGGCTATAATATGATTAT    | 560 |
| Consensus      | taattat ccctcatgacctctggc ataatatgattttat  |     |
| Isoform0025243 | CTCAACTTTAGCAGAACTAACCGAGCCCTTTGACTTA      | 600 |
| ND1            | CTCAACTTTAGCAGAACTAACCGAGCCCTTTGACTTA      | 600 |
| Consensus      | ctcaactttagcagaaactaaccgagccctttgactta     |     |
| Isoform0025243 | ACTGAGGGAGAAATCAGAATTAGTATCTGGTTTCAACGTAG  | 640 |
| ND1            | ACTGAGGGAGAAATCAGAATTAGTATCTGGTTTCAACGTAG  | 640 |
| Consensus      | actgagggagaatcagaattagtatctggtttcaacgtag   |     |
| Isoform0025243 | AATATGCAGGAGGACCCCTCGCTCTCTTCTTTCTAGCAGA   | 680 |
| ND1            | AATATGCAGGAGGACCCCTCGCTCTCTTCTTTCTAGCAGA   | 680 |
| Consensus      | aatatgcaggaggacccttcgctctcttctttctagcaga   |     |
| Isoform0025243 | ATATGCTAATATTATCATAATAAATGCCCTCACAAATTATC  | 720 |
| ND1            | ATATGCTAATATTATCATAATAAATGCCCTCACAAATTATC  | 720 |
| Consensus      | atatgctaataattatcataataaatgccctcacaaattatc |     |
| Isoform0025243 | CTATTCTTAGGCGCATATAATAATCCTATATTCTCAGAAC   | 760 |
| ND1            | CTATTCTTAGGCGCATATAATAATCCTATATTCTCAGAAC   | 760 |
| Consensus      | ctattcttaggcgcataataaatcctatattctcagaac    |     |
| Isoform0025243 | TTTACACCACCAACTTCACCACTAAAACCTCTTTATTCAC   | 800 |
| ND1            | TTTACACCACCAACTTCACCACTAAAACCTCTTTATTCAC   | 800 |
| Consensus      | tttacaccaccaacttcaccactaaaactctcttatttcac  |     |
| Isoform0025243 | AATAATATTTTATGAATTCGAGCATCTTACCCTCGATTTC   | 840 |
| ND1            | AATAATATTTTATGAATTCGAGCATCTTACCCTCGATTTC   | 840 |
| Consensus      | aataatattttatgaattcgagcatcttaccctcgatttc   |     |
| Isoform0025243 | CGATATGACCAACTAATACACCTACTATGAAAAAATTTTC   | 880 |
| ND1            | CGATATGACCAACTAATACACCTACTATGAAAAAATTTTC   | 880 |
| Consensus      | cgatatgaccaactaatacacctactatgaaaaaactttc   |     |
| Isoform0025243 | TACCCCTTACTTTAGTAATATGTATATGACATGTAACCTT   | 920 |
| ND1            | TACCCCTTACTTTAGTAATATGTATATGACATGTAACCTT   | 920 |
| Consensus      | tacccttactttagtaatatgtatatgacatgtaac tt    |     |
| Isoform0025243 | ACCAATTATTCTAGCAAGTATCCCAACCCATAACA...     | 954 |
| ND1            | ACCAATTATTCTAGCAAGTATCCCAACCCATAACA...     | 956 |
| Consensus      | accaattattctagcaagtatcccacccataaca         |     |

|                |                                                                   |     |
|----------------|-------------------------------------------------------------------|-----|
| Isoform0025243 | MYFINLLTIIVPILLAVAFLTLLERKVLGYIQLRKGPNIIV                         | 40  |
| ND1            | MYFINLLTIIVPILLAVAFLTLLERKVLGYIQLRKGPNIIV                         | 40  |
| Consensus      | myfinllttiivpillavaflltllerkvlgylrkgpniv                          |     |
| Isoform0025243 | GPYGLLQPIADAVKLF <sup>T</sup> KEPIQPLTSSSLTLFIIAPTLALT            | 80  |
| ND1            | GPYGLLQPIADAVKLF <sup>T</sup> KEPIQPLTSSSLTLFIIAPTLALT            | 80  |
| Consensus      | gpygllqpiadavklftkepiqpltsssltlfiiaptlalt                         |     |
| Isoform0025243 | LALIIIPLPIPHPLININLSILFILALSSLAVYAILSGAS                          | 120 |
| ND1            | LALIIIPLPIPHPLININLSILFILALSSLAVYAILSGAS                          | 120 |
| Consensus      | laliipiplpiphplininlsilfilalsslavyails gas                        |     |
| Isoform0025243 | NSKYALIGALRAVAQTISYEVTLAI <sup>I</sup> IILSILLINGSFTLT            | 160 |
| ND1            | NSKYALIGALRAVAQTISYEVTLAI <sup>I</sup> IILSILLINGSFTLT            | 160 |
| Consensus      | nskyaligalravaqtisyevtlaiiilsillingsftlt                          |     |
| Isoform0025243 | <sup>T</sup> LITTQEYILIIPSPLAIIFISTLAETNRAPFDL <sup>T</sup> EGESE | 200 |
| ND1            | TLITTQEYILIIPSPLAIIFISTLAETNRAPFDL <sup>T</sup> EGESE             | 200 |
| Consensus      | littqeyiliipsplaiifistlaetnrapfdltegese                           |     |
| Isoform0025243 | LVSGFNVEYAGGPFALFFLAEYANII <sup>I</sup> IINALTIILFLGAY            | 240 |
| ND1            | LVSGFNVEYAGGPFALFFLAEYANII <sup>I</sup> IINALTIILFLGAY            | 240 |
| Consensus      | lvsgfnveyaggpfalfflaeyaniiiinaltiilflgay                          |     |
| Isoform0025243 | NNPIFSELYTTNFTTKTLLFTIIIFLIRASYPRFRYDQLIH                         | 280 |
| ND1            | NNPIFSELYTTNFTTKTLLFTIIIFLIRASYPRFRYDQLIH                         | 280 |
| Consensus      | nnpifselyttnfttktl lftiiflirasyprfrydqlih                         |     |
| Isoform0025243 | LLKNFLPLTLVICIHVTLPIILASIPPI                                      | 308 |
| ND1            | LLKNFLPLTLVICIHVTLPIILASIPPI                                      | 308 |
| Consensus      | llknflpltlvicihv tlp iilasippi                                    |     |

**Figure S7.** Several published genes were compared with full-length transcripts, the comparative result of the *ND1* gene.

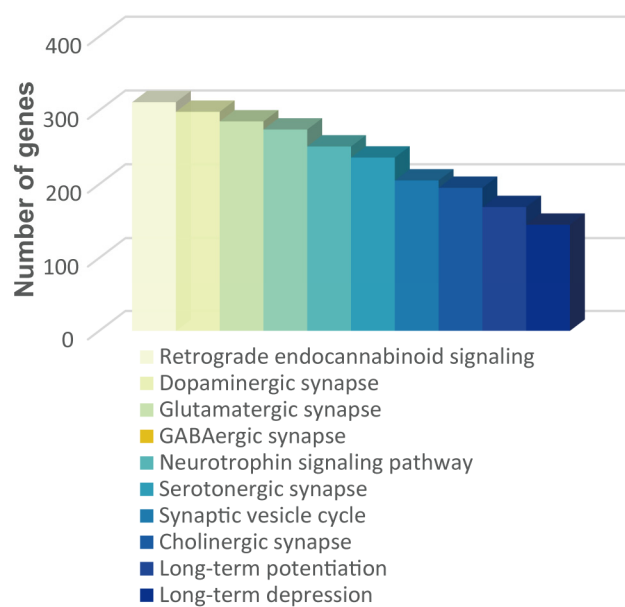

**Figure S8. The proportion of full-length transcripts annotated in the metabolic pathways of the neural-related system.**

|                |                                            |     |
|----------------|--------------------------------------------|-----|
| Isoform0022807 | ATGGATTGGGGTACCCTGCACACTTTTCATCGGGGGTGTGA  | 40  |
| GJB6           | ATGGATTGGGGTACCCTGCACACTTTTCATCGGGGGTGTGA  | 40  |
| Consensus      | atggattggggtaccctgcacactttcatcgggggtgtga   |     |
| Isoform0022807 | ACAAACACTCCACCAGCATCGGGAAGGTGTGGATCACCGT   | 80  |
| GJB6           | ACAAACACTCCACCAGCATCGGGAAGGTGTGGATCACCGT   | 80  |
| Consensus      | acaaactccaccagcatcgggaaggtgtggatcacctgt    |     |
| Isoform0022807 | CATCTTCATCTTCCGTGTCATGATCCTCGTGGTGGCCGCT   | 120 |
| GJB6           | CATCTTCATCTTCCGTGTCATGATCCTCGTGGTGGCCGCT   | 120 |
| Consensus      | catcttcattctccgtgtcatgatcctcgtgggtggccgct  |     |
| Isoform0022807 | CAGGAAGTGTGGGGAGATGAACAGGAAGACTTTGTGTGCA   | 160 |
| GJB6           | CAGGAAGTGTGGGGAGATGAACAGGAAGACTTTGTGTGCA   | 160 |
| Consensus      | caggaaagtgtggggagatgaacaggaagactttgtgtgca  |     |
| Isoform0022807 | ACACTCTGCAGCCAGGATGCAGAAACGTGTGCTATGACCA   | 200 |
| GJB6           | ACACTCTGCAGCCAGGATGCAGAAACGTGTGCTATGACCA   | 200 |
| Consensus      | acactctgcagccaggatgcagaaactgtgctatgacca    |     |
| Isoform0022807 | CTTCTTCCCCGTGTCCACATCCGGCTGTGGGCCCTGCAG    | 240 |
| GJB6           | CTTCTTCCCCGTGTCCACATCCGGCTGTGGGCCCTGCAG    | 240 |
| Consensus      | cttcttccccgtgtccacatccggctgtgggccctgcag    |     |
| Isoform0022807 | CTCATCTTCTGCTCTCCACCCCTGCCCTGCTTGTGGCCATGC | 280 |
| GJB6           | CTCATCTTCTGCTCTCCACCCCTGCCCTGCTTGTGGCCATGC | 280 |
| Consensus      | ctcatcttctgctctccaccctgccctgcttgtggccatgc  |     |
| Isoform0022807 | ACGTTGCCTACTACCGGCAGGAGGCCGCCGCAAATTCAG    | 320 |
| GJB6           | ACGTTGCCTACTACCGGCAGGAGGCCGCCGCAAATTCAG    | 320 |
| Consensus      | acgttgcctactaccggcaggaggccgccgcaaattcag    |     |
| Isoform0022807 | ACGAGGAGAGAAGAGAAATGAATTCAAAGACTTGAAGAC    | 360 |
| GJB6           | ACGAGGAGAGAAGAGAAATGAATTCAAAGACTTGAAGAC    | 360 |
| Consensus      | acgaggagagaagagaaatgaattcaaagacttgaagac    |     |
| Isoform0022807 | ATTAAAAAGCAGAAGGTTTCGGATCGAGGGAGCCCTGTGGT  | 400 |
| GJB6           | ATTAAAAAGCAGAAGGTTTCGGATCGAGGGAGCCCTGTGGT  | 400 |
| Consensus      | attaaaaagcagaaggtttcggatcgaggagccctgtggt   |     |
| Isoform0022807 | GGACGTACACCAGCAGCATATTTTCCGAATCATCTTCGA    | 440 |
| GJB6           | GGACGTACACCAGCAGCATATTTTCCGAATCATCTTCGA    | 440 |
| Consensus      | ggacgtacaccagcagcatattttccgaatcatcttcga    |     |
| Isoform0022807 | AGCCTCCTTCATGTATGTGTTTTACTTCCTATACAATGGG   | 480 |
| GJB6           | AGCCTCCTTCATGTATGTGTTTTACTTCCTATACAATGGG   | 480 |
| Consensus      | agcctccttcattgtatgtgttttacttccataacaatggg  |     |
| Isoform0022807 | TACCACCTGCCCTGGGTGCTGAAATGTGGGGTTGATCCTT   | 520 |
| GJB6           | TACCACCTGCCCTGGGTGCTGAAATGTGGGGTTGATCCTT   | 520 |
| Consensus      | taccacctgccctgggtgctgaaatgtggggttgatcctt   |     |
| Isoform0022807 | GCCCCAATCTTGTGACTGCTTCATCTCCAGACCTACGGA    | 560 |
| GJB6           | GCCCCAATCTTGTGACTGCTTCATCTCCAGACCTACGGA    | 560 |
| Consensus      | gccccaatcttgttgactgcttcattctccagacctacgga  |     |
| Isoform0022807 | GAAAACCGTGTTACCATTTTTATGATCTCTGCCTCGGTG    | 600 |
| GJB6           | GAAAACCGTGTTACCATTTTTATGATCTCTGCCTCGGTG    | 600 |
| Consensus      | gaaaaccgtgttcaccatttttatgatctctgcctcgggtg  |     |
| Isoform0022807 | ATTTGCATGCTACTCAATGTGGCCGAGTTGTGCTACCTGC   | 640 |
| GJB6           | ATTTGCATGCTACTCAATGTGGCCGAGTTGTGCTACCTGC   | 640 |
| Consensus      | atttgcattgctactcaatgtggccgagttgtgctacctgc  |     |
| Isoform0022807 | TGCTGAAAGTGTGTTTCAGGAAATCAAAAAGAGCCAGAC    | 680 |
| GJB6           | TGCTGAAAGTGTGTTTCAGGAAATCAAAAAGAGCCAGAC    | 680 |
| Consensus      | tgctgaaagtgtgtttcaggaaatcaaaaa agccagac    |     |
| Isoform0022807 | ACAAAGAAACCACCCAGTCATGCCCTAAAGGAGAGTAAG    | 720 |
| GJB6           | ACAAAGAAACCACCCAGTCATGCCCTAAAGGAGAGTAAG    | 720 |
| Consensus      | acaaagaaaccacccagtcattgccctaaaggagagtaag   |     |
| Isoform0022807 | CAAAATGAAATGAATGAGCTGATTCAGATAGTGGTCAAA    | 760 |
| GJB6           | CAAAATGAAATGAATGAGCTGATTCAGATAGTGGTCAAA    | 760 |
| Consensus      | caaatgaaatgaatgagctgatttcagatagtgggtcaaa   |     |
| Isoform0022807 | ATGCAACCACTGGTTTTCCAAGT..                  | 783 |
| GJB6           | ATGCAACCACTGGTTTTCCAAGT..TA                | 785 |
| Consensus      | atgcaaccactggttttccaagt                    |     |



|                |                                            |     |
|----------------|--------------------------------------------|-----|
| Isoform0022807 | MDWGTLLHTFIGGVNKHSTSIGKVWITVIFIFRVMILVVAA  | 40  |
| GJB6           | MDWGTLLHTFIGGVNKHSTSIGKVWITVIFIFRVMILVVAA  | 40  |
| Consensus      | mdwgtllhtfiggvnkhstsigkvwitvififrvmilvvaa  |     |
| Isoform0022807 | QEVWGDEQEDFVCNTLQPGCRNVCYDHFFPVSHIRLWALQ   | 80  |
| GJB6           | QEVWGDEQEDFVCNTLQPGCRNVCYDHFFPVSHIRLWALQ   | 80  |
| Consensus      | qevwgdeqedfvcntlqpgcrnvcydhffpvshirlwalq   |     |
| Isoform0022807 | LIFVSTPALLVAMHVAYYRQEAARKFRRGEKRNEFKDLED   | 120 |
| GJB6           | LIFVSTPALLVAMHVAYYRQEAARKFRRGEKRNEFKDLED   | 120 |
| Consensus      | lifvstpallvamhvayyrqeaarkfrrgekrnefkdued   |     |
| Isoform0022807 | IKKQKVRIEGALWWTYTSSIFFRIIFEASFMYVFYFLYNG   | 160 |
| GJB6           | IKKQKVRIEGALWWTYTSSIFFRIIFEASFMYVFYFLYNG   | 160 |
| Consensus      | ikkqkvriegalwwtytssiffriifeasfmyvfyflyng   |     |
| Isoform0022807 | YHLPWVLKCGVDPCPNLVDCFISRPTTEKTVFTIFMISASV  | 200 |
| GJB6           | YHLPWVLKCGVDPCPNLVDCFISRPTTEKTVFTIFMISASV  | 200 |
| Consensus      | yhlpwvlkcgvdpcpnlvdcfistrpttektvftifmisasv |     |
| Isoform0022807 | ICMLLNVAELCYLLLKVCFRKSKRAQTQRNHPHALKESK    | 240 |
| GJB6           | ICMLLNVAELCYLLLKVCFRKSKRAQTQRNHPHALKESK    | 240 |
| Consensus      | icmllnvaelcylllkvcfrksk aqtqrnhpshalkesk   |     |
| Isoform0022807 | QNEMNELISDSGQNATTGFP                       | 260 |
| GJB6           | QNEMNELISDSGQNATTGFP                       | 260 |
| Consensus      | qnemnelisdsgqnattgfp                       |     |

**Figure S9.** Several published genes were compared with full-length transcripts, the comparative result of the *GJB6* gene.

1

|                |                                           |     |
|----------------|-------------------------------------------|-----|
| Isoform0013754 | ITHCAGCTTAWSPCSFNSPDMETPLQFQRGFFSE        | 40  |
| SK2            | ITHCAGCTTAWSPCSFNSPDMETPLQFQRGFFSE...PR   | 36  |
| Consensus      | ithcagcttawspcsfnspdmetylqfqrgrffse pr    |     |
| Isoform0013754 | SSHLHCQQQQQSQDKPCPPFASLPHAHHPHLAHQQPGSG   | 80  |
| SK2            | SSHLHCQQQQQSQDKPCPPFASLPHAHHPHLAHQQPGSG   | 75  |
| Consensus      | sshlhcqqqq sqdkpcppfaslphahhhphlahqqpgsg  |     |
| Isoform0013754 | GSSPCLRCNSCASSGAPGAGAGDNLSELLRTSSPGAF     | 120 |
| SK2            | GSSPCLRCNSCASSGAP...AGAGDNLSELLRTSSPGG.F  | 111 |
| Consensus      | gsspclrcnscassgap agagdnlslllrtsspgg f    |     |
| Isoform0013754 | RTRTSSPLSGSSCCCCSRRGSQNLVSELTPSSHASALRQ   | 160 |
| SK2            | RTRTSSPLSGSSCCCCS.RRGSQLNVSELTPSSHASALRQ  | 150 |
| Consensus      | rtrtssplsgsscccc rrgsqlnvseltpsshasalrq   |     |
| Isoform0013754 | QYAAQPPASASLYHQCHSLQPAASPTGSLGSLGSGPPLSHH | 200 |
| SK2            | QYAAQ.PASASLYHQCHSLQPAASPTGSLGSLGSGPPLSHH | 189 |
| Consensus      | qyaqq asaslyhqchslqpaasptgslgslgsgpplshh  |     |
| Isoform0013754 | LAHHQHQSQARRESNPFTIAMSSCRYNGGVMRP         | 240 |
| SK2            | LAHHQHQSQARRESNPFTIAMSSCRYNGGVMRP         | 225 |
| Consensus      | h lahhqhqsqarresnpfteiamsscrynggvmrp      |     |
| Isoform0013754 | LSNLSASRRNLHEMDSEAQLQPPASVGGGGCASSP       | 280 |
| SK2            | LSNLSASRRNLHEMDSEAQLQPPASVGGGGCASSP....   | 260 |
| Consensus      | lsnlsasrrnlhemdseaqlppasvgggg assp        |     |
| Isoform0013754 | AAASSAPEIVVSKPEHNNSNNLALYGTGGCGSTGGGGS    | 320 |
| SK2            | .SASSAPEIVVSKPEHNNSNNLALYGTGGG.....GGG    | 293 |
| Consensus      | assapeivvskpehnnsnnlalytggg gg            |     |
| Isoform0013754 | GSGHGSSSGTKSSKKKNQNIQYKLGHRRALFEKRRLSDY   | 360 |
| SK2            | GSGHGSSSGTKSSKKKNQNIQYKLGHRRALFEKRRLSDY   | 333 |
| Consensus      | gsghgsssgtksskkknqniqyklghrralfekrkrlsdy  |     |
| Isoform0013754 | ALIFGMFGIVVMVETELSWGAYDKASLYSLALKCLISLS   | 400 |
| SK2            | ALIFGMFGIVVMVETELSWGAYDKASLYSLALKCLISLS   | 373 |
| Consensus      | alifgmfgivvmvietelswgaydkaslyslalkclisls  |     |
| Isoform0013754 | TIILLGLIIVYHAREIQLFMVDNGADDWRIAMTYERIFFI  | 440 |
| SK2            | TIILLGLIIVYHAREIQLFMVDNGADDWRIAMTYERIFFI  | 413 |
| Consensus      | tiillgliivyhareiqlfmvdngaddwriamtyeriffi  |     |
| Isoform0013754 | CLEILVCAIHPIPGNYTFTWTARLAFSYAPSTTTADVDII  | 480 |
| SK2            | CLEILVCAIHPIPGNYTFTWTARLAFSYAPSTTTADVDII  | 453 |
| Consensus      | cleilvcaihpipgnytftwtarlafsyapstttadvdii  |     |
| Isoform0013754 | LSIPMFLRLYLIARVMLLHLSKLFDAASSRSIGALNKINFN | 520 |
| SK2            | LSIPMFLRLYLIARVMLLHLSKLFDAASSRSIGALNKINFN | 493 |
| Consensus      | lsipmflrlyliarvmlhlsklftdassrsigalnkinfn  |     |
| Isoform0013754 | TRFVMKTLMTICPGTVLLVFSISLWIIAAWTVRACERYHD  | 560 |
| SK2            | TRFVMKTLMTICPGTVLLVFSISLWIIAAWTVRACERYHD  | 533 |
| Consensus      | trfvmktlmticpgtvllvfsislwiiawtvraceryhd   |     |
| Isoform0013754 | QQDVTSNFLGAMWLISITFLSIGYGMVPNTYCGKGVCLL   | 600 |
| SK2            | QQDVTSNFLGAMWLISITFLSIGYGMVPNTYCGKGVCLL   | 573 |
| Consensus      | qqdvtsnflgamwlisitflsigygmvpntyckgkvcll   |     |
| Isoform0013754 | TGIMGAGCTALVVAVVARKLELTKAEKHVHNFMMDTQLTK  | 640 |
| SK2            | TGIMGAGCTALVVAVVARKLELTKAEKHVHNFMMDTQLTK  | 613 |
| Consensus      | tgimgagctalvvavvarkleltkaekhvhnfmmdtqltk  |     |
| Isoform0013754 | RVKNAAANVLRETWLIYKNTKLKIDHAKVRKHQRKFLQ    | 680 |
| SK2            | RVKNAAANVLRETWLIYKNTKLKIDHAKVRKHQRKFLQ    | 653 |
| Consensus      | rvknaaanvlretwliykntklkiddhakvrkhqrkflq   |     |
| Isoform0013754 | AIHQLRSVKMEQRKLNQANTLVDLAKTQNIYDMISDLN    | 720 |
| SK2            | AIHQLRSVKMEQRKLNQANTLVDLAKTQNIYDMISDLN    | 693 |
| Consensus      | aihqlrsvkmeqrklndqantlvdaktqniymisdln     |     |
| Isoform0013754 | ERSEDFEKRIVTLETKETLIGSIHALPGLISQTIROQQR   | 760 |
| SK2            | ERSEDFEKRIVTLETKETLIGSIHALPGLISQTIROQQR   | 733 |
| Consensus      | ersedfekrivtletketligsihalpglisqtirqqqr   |     |
| Isoform0013754 | DFIEAQMENYDKHVAYNAERSR                    | 782 |
| SK2            | DFIEAQMENYDKHVAYNAERSR                    | 755 |
| Consensus      | dfieaqmenydkhvaynaersr                    |     |

Figure S10. Several published genes were compared with full-length transcripts, the comparative result of the *SK2* gene.
